# Supplementary material for: BG-flow, a new flow cytometry tool for G-quadruplex quantification in fixed cells
Source: PubMed Central journal article supplement (PMC7953821; doi:10.1186/s12915-021-00986-6), 2021-03-11

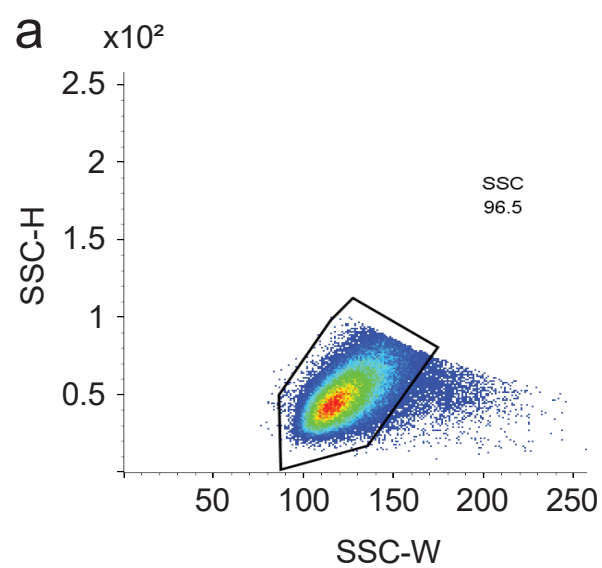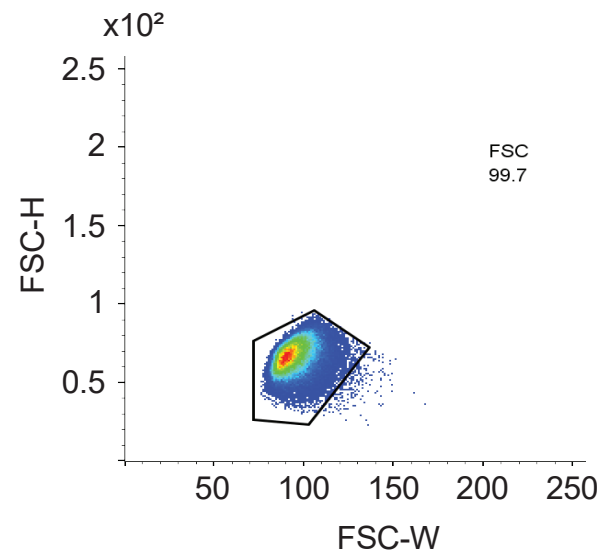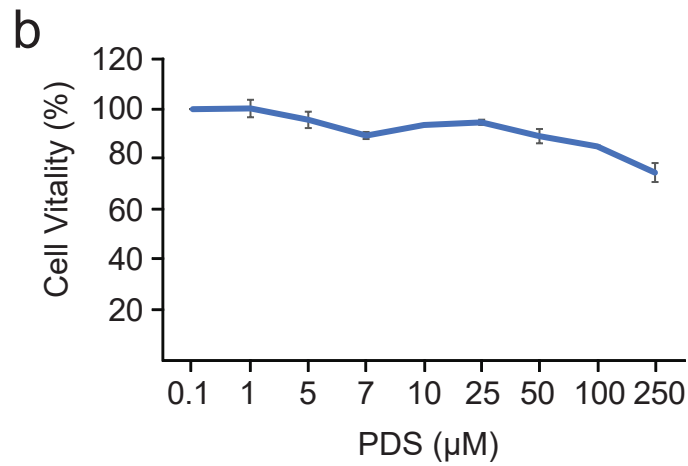

80% Vitality =  $\sim 250 \mu\text{M}$

IC50 =  $> 500 \mu\text{M}$

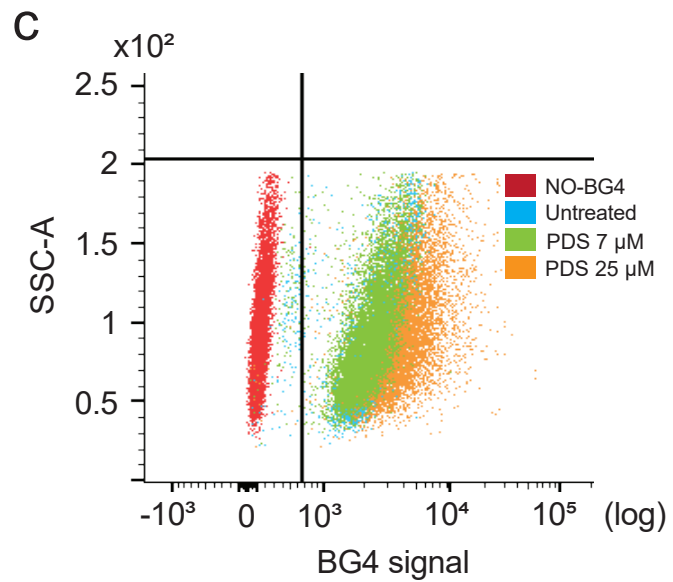

Supplement: 12915_2021_986_MOESM5_ESM.pdf [file 12915_2021_986_MOESM5_ESM.pdf]
